# Supplementary material
Source: Springer Nature journal article supplement (https://www.springermedizin.de/resource/supplementary/12885_2014_4793_MOESM4_ESM.pdf/9467288)
Supplement: MOESM4 [file 9467288]

siCN

siS6K1

siGLI1

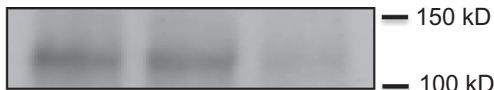

GLI1

150 kD

100 kD

GLI1 relative protein expression

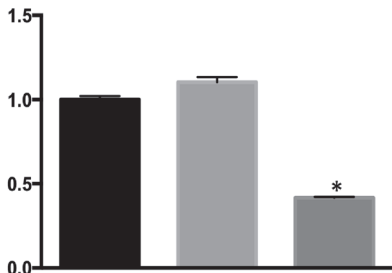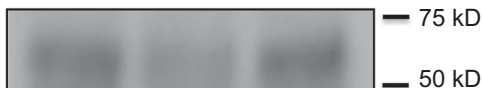

S6K1

75 kD

50 kD

S6K1 relative protein expression

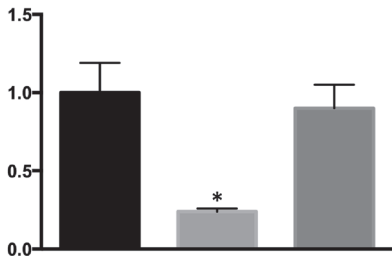 $\beta$ -Actin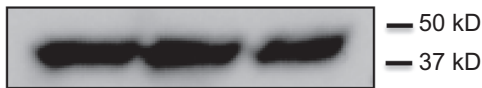

50 kD

37 kD
